# Supplementary material
Source: PubMed Central journal article supplement (PMC11027827)
Supplement: 262_2019_2438_MOESM1_ESM.pdf [file 262_2019_2438_MOESM1_ESM.pdf]

## Supplementary Material

### Supplementary Tables

Supplementary table 1

| ASO ID          | Length | Sequence                                  | Description                                           |
|-----------------|--------|-------------------------------------------|-------------------------------------------------------|
| A06007H         | 15     | +G*+A*+T*T*G*T*C*C*A*G*G*A*+G*+T*+T       | Human IDO1-specific ASO                               |
| A06008H         | 15     | +C*+T*+C*A*A*C*T*C*T*T*T*C*+T*+C*+G       | Human IDO1-specific ASO                               |
| A06030H         | 16     | +A*+G*+G*C*G*C*T*G*T*G*A*C*T*+T*+G*+T     | Human IDO1-specific ASO                               |
| A06043H         | 17     | +C*+C*+A*G*A*C*T*C*T*A*T*G*A*G*+A*+T*+C   | Human IDO1-specific ASO                               |
| A06044H         | 17     | +G*+A*+G*A*T*G*A*T*C*A*A*T*G*C*+T*+G*+A   | Human IDO1-specific ASO                               |
| A06045H         | 17     | +A*+G*+G*C*G*C*T*G*T*G*A*C*T*T*+G*+T*+G   | Human IDO1-specific ASO                               |
| A07006H         | 14     | +T*+G*+T*A*T*G*A*C*A*G*C*+C*+G*+T         | Human TDO2-specific ASO                               |
| A07058H         | 17     | +A*+T*+C*G*T*G*G*T*G*C*T*G*A*A*+C*+A*+A   | Human TDO2-specific ASO                               |
| Control oligo 1 | 18     | +C*+G*+T*T*T*A*G*G*C*T*A*T*G*T*A*+C*+T*+T | Control oligonucleotide,<br>reference: PMID: 26072406 |
| Control oligo 2 | 17     | +T*+C*+T*A*T*C*G*T*G*A*T*G*T*T*+T*+C*+T   | Control oligonucleotide                               |

(+) LNA-modified nucleotide, (\*) PTO linkage

## Supplementary Figures

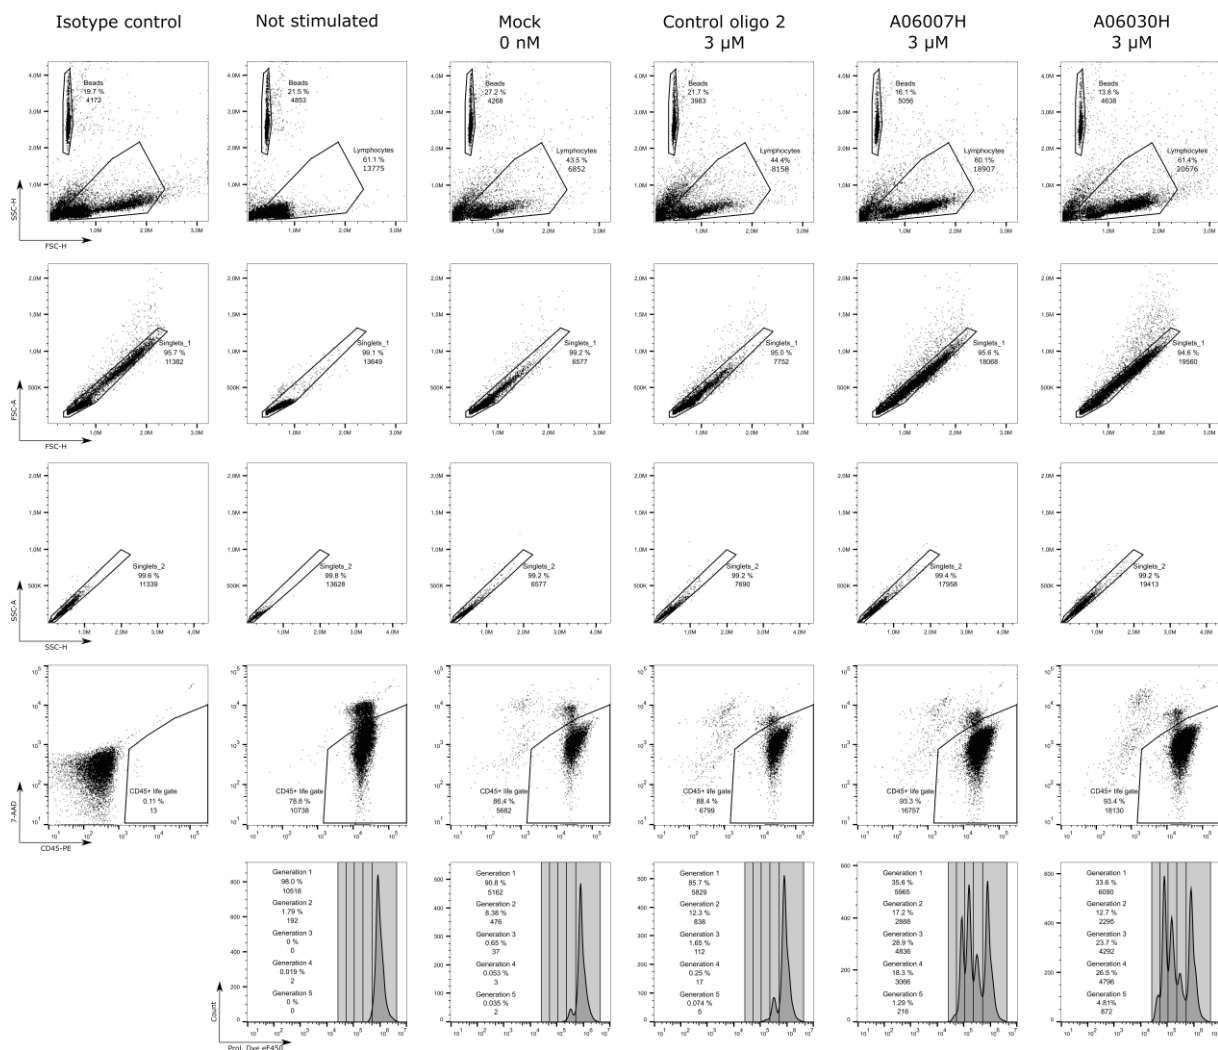

### Supplementary Figure S1 Flow cytometry gating strategy for determination of proliferation of T cells in coculture with EFO-21 cells

10 000 counting beads were added to T cell / EFO-21 cocultures on day four after start of coculture of proliferation dye-labelled T cells with EFO-21 cells, that had not been treated with an oligonucleotide (Mock, 0 nM), with the Control oligo 2 (conc. 3 μM), the IDO1-specific ASO A06007H or A06030H at different concentrations. Subsequently, T cells were harvested and stained with 7-AAD for exclusion of dead cells and with a CD45 specific antibody in order to exclude EFO-21 cells that had lost adherence to the tissue culture plate during the process of T cell harvesting. Cells were analyzed on an ACEA NovoCyte Flow Cytometer. Absolute cell counts were calculated by dividing the number of recorded cells in the respective gate to the number of recorded counting beads multiplied by 10 000.

a)

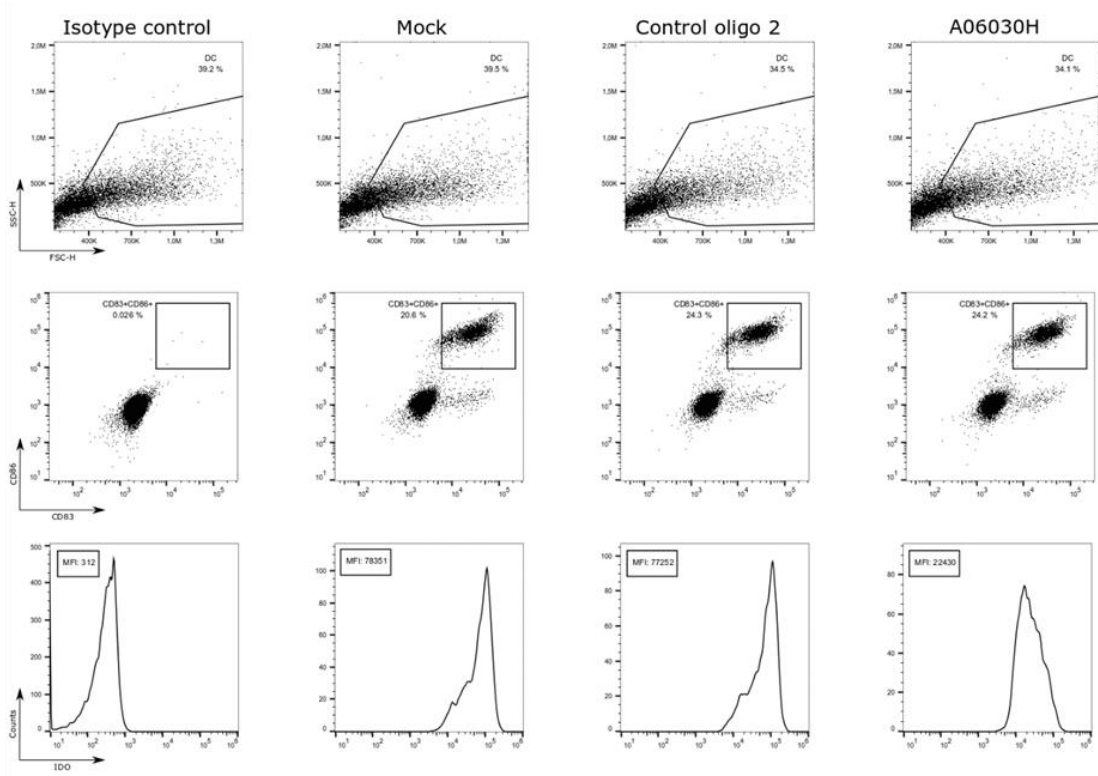

b)

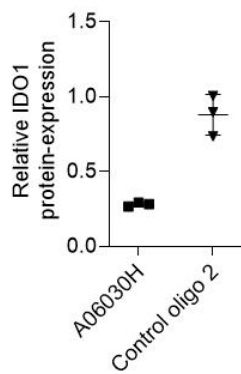

**Supplementary Figure S2 Knockdown of IDO1 protein expression in human DC**

Human dendritic cells were generated as described in materials and methods and treated with the control oligo 2 (concentration: 6.25  $\mu$ M) or the IDO1-specific ASO A06030H (concentration: 6.25  $\mu$ M) without the use of a transfection reagent. IDO1 protein expression was analyzed by flow cytometry. a) Exemplary gating strategy. b) Relative IDO1 protein expression (median fluorescence intensity) is depicted as compared to mock-treated DC (set to 1). The mean of triplicates  $\pm$  SD from a representative experiment is shown.

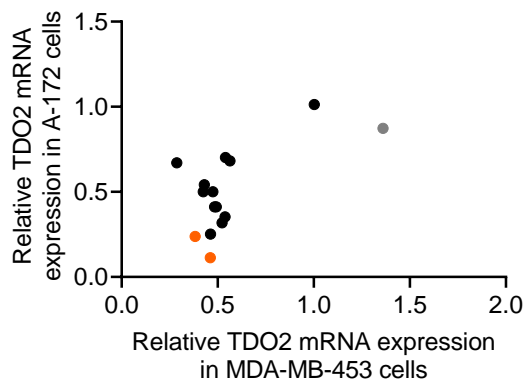

**Supplementary Figure S3 TDO2 knockdown in MDA-MB-453 and A-172 cells**

Data for MDA-MB-453 cells are derived from Figure 1c. TDO2 mRNA expression was determined in A-172 cells that had been treated with TDO2-specific LNA-modified ASOs (black and orange circles) or the control oligo 1 (grey circle) without the use of a transfection reagent for four days (concentration: 5  $\mu$ M). ASOs that were selected for IC<sub>50</sub> determination are marked in orange.
